# Supplementary material
Source: PubMed Central journal article supplement (PMC3064388)
Supplement: 1016606108_pnas.201016606SI.pdf [file 1016606108_pnas.201016606SI.pdf]

# Supporting Information

Li et al. 10.1073/pnas.1016606108

## SI Materials and Methods

**Construction of JFH1-Based HCV Genotypes 1–6 5' UTR-NS2 Recombinants and Derived Mutants.** The JFH1 5' UTR of Core-NS2 recombinants pH77C/JFH1<sub>V787A,Q1247L</sub> (1), pJ4/JFH1<sub>F886L,Q1496L</sub> (2), pJ6/JFH (3), pJ8/JFH1 (2), pS52/JFH1<sub>I793S,K1404Q</sub> (2), pED43/JFH1- $\gamma$ T827A,T977S (1), pSA13/JFH1<sub>A1022G,K1119R</sub> (4), and pHK6a/JFH1<sub>F350S,N417T</sub> (2) was replaced by strain-specific 5' UTR to obtain 5' UTR-NS2 recombinants pH77C<sup>5'UTR-NS2</sup>/JFH1<sub>V787A,Q1247L</sub> (genotype 1a), pJ4<sup>5'UTR-NS2</sup>/JFH1<sub>F886L,Q1496L</sub> (1b), pJ6<sup>5'UTR-NS2</sup>/JFH1 (2a), pJ8<sup>5'UTR-NS2</sup>/JFH1 (2b), pS52<sup>5'UTR-NS2</sup>/JFH1<sub>I793S,K1404Q</sub> (3a), pED43<sup>5'UTR-NS2</sup>/JFH1<sub>T827A,T977S</sub> (4a), pSA13<sup>5'UTR-NS2</sup>/JFH1<sub>A1022G,K1119R</sub> (5a), and pHK6a<sup>5'UTR-NS2</sup>/JFH1<sub>F350S,N417T</sub> (6a), respectively (Fig. 1). For recombinants with deletions, insertions, or point mutations, sequences were synthesized (GenScript) or amplified by PCR. The T7 promoter was added immediately upstream of the 5' UTR to enable in vitro transcription. In cases with A at the 5' terminus of the 5' UTR, G was inserted immediately upstream to enhance in vitro transcription, unless otherwise stated. The final maxi-preparation of all constructs was confirmed by sequence analysis, including T7 promoter to the 3'-terminal nucleotide of the HCV genome (Macrogen).

**Analysis of the 5' UTR Sequences of HCV Genotypes 1–6 Prototype Strains.** The 5' UTR of HCV strain H77 (genotype 1a), J6 (2a), S52 (3a), and ED43 (4a) was amplified from full-length clones pCV-H77C (5), pJ6CF (6), pS52 (7), and pED43 (7), respectively. The 5' UTR of J6, S52, and ED43 was further confirmed by the 5' RACE procedure (see below) using plasma pools from experimentally infected chimpanzees (8). From the chimpanzee plasma pools, the 5' UTR of strain J4 (1b), J8 (2b), SA13 (5a), and HK6a (6a) was first amplified by RT-PCR and further confirmed by the 5' RACE procedure.

**Rapid Amplification of 5' cDNA Ends (5' RACE).** The 5' RACE system (rapid amplification of cDNA ends; Invitrogen) with dC or dA tailing technology was used to analyze the 5' UTR and 3' UTR of HCV. For the 5' UTR, RNA was extracted from 200  $\mu$ L of virus-containing culture supernatant or from 200  $\mu$ L plasma pools of experimentally infected chimpanzees using TRIzol LS Reagent (Invitrogen). The RNA was denatured at 70 °C for 10 min, and cDNA was synthesized at 42 °C for 30 min with SuperScript II RT (Invitrogen) and HCV genotype-specific antisense primers in the core coding region: 1a2a4a5a6a7aR443, 5'-CCCCTGCGCGGCAACAAGTA-3'; 1bR443, 5'-CCCCTGCGCGGCAACAGGTA-3'; 2bR443, 5'-CCCCTGCGCGGCAACAAGTA-3'; 3aR443, 5'-CCCCTGCGCGGCAACACGTA-3'. After cDNA purification and tailing, the first round PCR was performed with Abridged Anchor Primer (Invitrogen) or Oligo dT-anchor primer (5'/3' RACE Kit, second generation; Roche) and genotype-specific core antisense primers: 1a2b6aR415, 5'-CCAACGATCTGACCGCCACCC-3'; 1b5aR418, 5'-ACTCCA-

CCAACGATCTGACCGCC-3'; 3aR415, 5'-CCACCAACGA-TCTGTCCGCCACCC-3'; 4aR415, 5'-ACCAACGATCTGGC-CACCACCC-3'; 2aR397, 5'-CCGCCCGGAACTTAACGTC-TTGT-3', followed by nested PCR with bridged Universal Amplification Primer (Invitrogen) or PCR anchor primer (5'/3' RACE Kit, second generation; Roche) and individual genotype-specific core antisense primers: 1a1b4aR352, 5'-GTGTTAC-GTTTGGTTTTCTTTGAGGTTTAGGA-3'; 2a2b3a5aR352, 5'-GTGTTTCTTTGTTTTCTTTGAGGTTTAGGA-3'; 6aR352, 5'-GTGTTTCTTTGTTTTCTTTGTTGGGTTTTG-GA-3'. The PCR products were directly sequenced or cloned into pCR2.1-TOPO (Invitrogen) for subsequent sequence analysis. To determine the 3' UTR sequence, total RNA was extracted from cells infected with HCV using TRIzol Reagent (Invitrogen). The 5' RACE procedure was performed on HCV RNA negative-strand using the 5' RACE system (Invitrogen) or 5'/3' RACE Kit, second generation (Roche), following the manufacturer's instructions. JFH1 NS5B-specific primers –JFH1R427, 5'-GCGGTGAAGACCAAGCTCAAACCTC-3', were used for reverse transcription; –JFH1R314, 5'-CGCCGACCCCGCTCAT-TACTCTT-3', for first-round PCR; and –JFH1R294, 5'-TCT-TCGGCCTACTCCTACTTTTCGT-3', for nested PCR. The PCR products were purified and cloned into pCR2.1-TOPO (Invitrogen) and 5–7 clones were subsequently sequenced. The consensus sequence was considered to reflect the 3' UTR sequence of recovered viruses.

**Focus-Forming Units (FFUs) Assay.** The FFU assay was performed to determine the infectivity titer of recovered viruses. Naive Huh7.5 cells were seeded in 96-well Nunc optical bottom plates (6  $\times$  10<sup>3</sup> cells/well) in 200  $\mu$ L of complete growth medium for ~16 h, infected with 100  $\mu$ L of twofold or higher serial virus dilutions in triplicates, and incubated for 48 h. The cells were fixed with methanol (–20 °C) and stained for HCV-infected cells using anti-HCV NS5A monoclonal antibody 9E10 (a gift from C. M. Rice, The Rockefeller University, New York), as previously described (1–3, 9). The number of FFUs was counted manually under the light microscope (2) or by automated counting with ImmunoSpot Series 5 UV Analyzer with customized software (CTL Europe) (10). For automated counting, the mean FFU counts of 3–6 negative wells were always <15, and this number was subtracted from FFUs in experimental wells. Limit of detection was set to the mean of negative wells + 3 SDs + 3. Counts of up to 200 FFUs/well were in the linear range of test dilution series and comparable to manual counts.

**Biological Software.** Sequencher (Gene Codes), Vector NTI (Invitrogen), and free software GENEDOC were used for sequence analysis, alignments, and analysis of restriction sites. Web-based software Mfold was used to analyze RNA secondary structure (11). HCV sequences were retrieved from the Los Alamos HCV Sequences Database and the European HCV Database.

1. Scheel TK, et al. (2008) Development of JFH1-based cell culture systems for hepatitis C virus genotype 4a and evidence for cross-genotype neutralization. *Proc Natl Acad Sci USA* 105:997–1002.
2. Gottwein JM, et al. (2009) Development and characterization of hepatitis C virus genotype 1-7 cell culture systems: Role of CD81 and scavenger receptor class B type I and effect of antiviral drugs. *Hepatology* 49:364–377.
3. Lindenbach BD, et al. (2005) Complete replication of hepatitis C virus in cell culture. *Science* 309:623–626.
4. Jensen TB, et al. (2008) Highly efficient JFH1-based cell-culture system for hepatitis C virus genotype 5a: Failure of homologous neutralizing-antibody treatment to control infection. *J Infect Dis* 198:1756–1765.

5. Yanagi M, Purcell RH, Emerson SU, Bukh J (1997) Transcripts from a single full-length cDNA clone of hepatitis C virus are infectious when directly transfected into the liver of a chimpanzee. *Proc Natl Acad Sci USA* 94:8738–8743.
6. Yanagi M, Purcell RH, Emerson SU, Bukh J (1999) Hepatitis C virus: An infectious molecular clone of a second major genotype (2a) and lack of viability of intertypic 1a and 2a chimeras. *Virology* 262:250–263.
7. Gottwein JM, et al. (2010) Novel infectious cDNA clones of hepatitis C virus genotype 3a (strain S52) and 4a (strain ED43): Genetic analyses and in vivo pathogenesis studies. *J Virol* 84:5277–5293.

- Bukh J, et al. (2010) Challenge pools of hepatitis C virus genotypes 1-6 prototype strains: Replication fitness and pathogenicity in chimpanzees and human liver-chimeric mouse models. *J Infect Dis* 201:1381–1389.
- Gottwein JM, et al. (2007) Robust hepatitis C genotype 3a cell culture releasing adapted intergenotypic 3a/2a (S52/JFH1) viruses. *Gastroenterology* 133:1614–1626.
- Scheel TK, et al. (2010) Recombinant HCV variants with NS5A from genotypes 1–7 have different sensitivities to an NS5A inhibitor but not interferon-alpha. *Gastroenterology* 140:1032–1042.
- Zuker M (2003) Mfold web server for nucleic acid folding and hybridization prediction. *Nucleic Acids Res* 31:3406–3415.

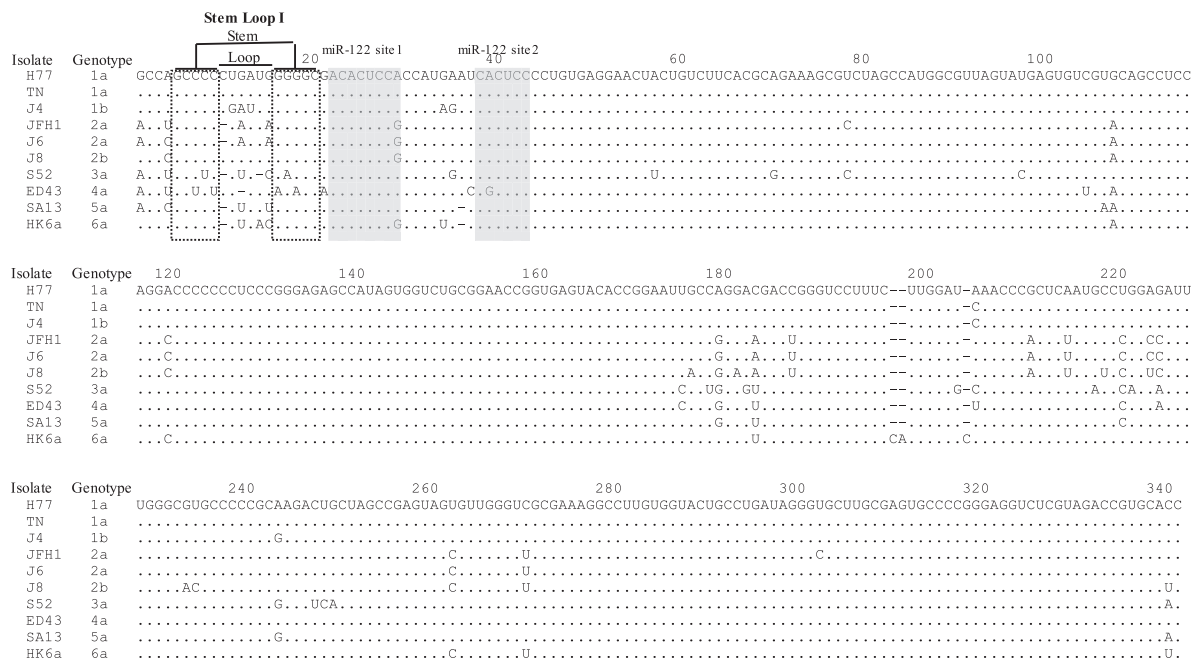

**Fig. S1.** Determination of the entire 5' UTR sequence of HCV prototype isolates of genotypes 1–6 using plasma pools from experimentally infected chimpanzees. HCV RNA of prototype genotypes 1b, 2a, 2b, 3a, 4a, 5a, and 6a HCV strains was extracted from infected chimpanzee plasma pools generated previously (1), and the 5' UTR sequences were determined by 5' RACE procedure (*SI Materials and Methods*). The 5' UTR sequences are aligned to the H77 isolate; the position numbering is according to the H77 reference sequence (GenBank accession no. AF009606) (2). A dot indicates that the nucleotide is identical to H77; a dash indicates a gap. The nucleotides forming the SLI structure is indicated, and the miR-122 binding sites are shaded. The 5' UTR of HCV isolates TN (genotype 1a; EF621489) (3) and JFH1 (genotype 2a; AB047639) (4) were included for comparison. We recently reported the 5' UTR sequences of the 3a and 4a strains (5).

- Bukh J, et al. (2010) Challenge pools of hepatitis C virus genotypes 1-6 prototype strains: Replication fitness and pathogenicity in chimpanzees and human liver chimeric mouse models. *J Infect Dis* 201:1381–1389.
- Kolykhalov AA, et al. (1997) Transmission of hepatitis C by intrahepatic inoculation with transcribed RNA. *Science* 277:570–574.
- Sakai A, et al. (2007) In vivo study of the HC-TN strain of hepatitis C virus recovered from a patient with fulminant hepatitis: RNA transcripts of a molecular clone (pHCTN) are infectious in chimpanzees but not in Huh7.5 cells. *J Virol* 81:7208–7219.
- Kato T, et al. (2001) Sequence analysis of hepatitis C virus isolated from a fulminant hepatitis patient. *J Med Virol* 64:334–339.
- Gottwein JM, et al. (2010) Novel infectious cDNA clones of hepatitis C virus genotype 3a (strain S52) and 4a (strain ED43): Genetic analyses and in vivo pathogenesis studies. *J Virol* 84: 5277–5293.

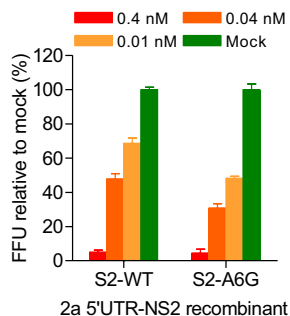

**Fig. S2.** MiR-122 antagonism efficiently suppresses the infection of HCV recombinant virus with mutation in the miR-122 binding site 2 (S2). Huh7.5 cells were transfected with LNA SPC3649 at 0.4, 0.04, and 0.01 nM, and infected with 2a 5' UTR-NS2 recombinant viruses with wild-type S2 (S2-WT) and mutated S2 nucleotide [A to G at position 6 (S2-A6G)]. The number of FFU was determined 48 h postinfection and presented as a percentage relative to respective infection in SPC3649-free mock-transfected controls (100%). The U3 insertion mutant Cell-U3 was included in parallel in the experiment and showed 94% infection (Fig. 6). Mean of triplicates  $\pm$  SEM is shown.

**Table S1. HCV infectivity and HCV RNA titers of JFH1-based recombinants with HCV genotypes 1–6 specific 5' UTR-NS2**

| 5' UTR | Core-NS2 | Recombinant                                              | Day p.i. | Infected cells, % | Infectivity titer             |                                                  | HCV RNA titer                |                                                 | Specific infectivity |           |
|--------|----------|----------------------------------------------------------|----------|-------------------|-------------------------------|--------------------------------------------------|------------------------------|-------------------------------------------------|----------------------|-----------|
|        |          |                                                          |          |                   | EC log <sub>10</sub> , FFU/mL | IC log <sub>10</sub> , FFU/10 <sup>5</sup> cells | EC log <sub>10</sub> , IU/mL | IC log <sub>10</sub> , IU/10 <sup>5</sup> cells | EC FFU/IU            | IC FFU/IU |
| JFH1   | 1a       | H77C/JFH1 <sub>V787A,Q1247L</sub>                        | 9        | 90                | 4.0                           | 2.5                                              | 7.7                          | 7.0                                             | 1/5,000              | 1/31,600  |
| 1a     | 1a       | H77 <sup>5'UTR-NS2</sup> /JFH1 <sub>V787A,Q1247L</sub>   | 9        | 90                | 4.1                           | 2.6                                              | 7.9                          | 7.5                                             | 1/6,300              | 1/79,400  |
| JFH1   | 1b       | J4/JFH1 <sub>F886L,Q1496L</sub>                          | 13       | 90                | 3.5                           | 2.4                                              | 7.4                          | 7.0                                             | 1/7,900              | 1/39,800  |
| 1b     | 1b       | J4 <sup>5'UTR-NS2</sup> /JFH1 <sub>F886L,Q1496L</sub>    | 13       | 80                | 3.0                           | 2.0                                              | 7.3                          | 7.1                                             | 1/20,000             | 1/125,900 |
| JFH1   | 2a       | J6/JFH1                                                  | 7        | 95                | 4.6                           | 2.4                                              | 8.2                          | 7.6                                             | 1/4,000              | 1/158,500 |
| 2a     | 2a       | J6 <sup>5'UTR-NS2</sup> /JFH1                            | 7        | 90                | 4.6                           | 2.4                                              | 7.7                          | 7.5                                             | 1/1,300              | 1/125,900 |
| JFH1   | 2b       | J8/JFH1                                                  | 9        | 80                | 3.4                           | 2.4                                              | 7.2                          | 7.2                                             | 1/6,300              | 1/63,100  |
| 2b     | 2b       | J8 <sup>5'UTR-NS2</sup> /JFH1                            | 9        | 80                | 3.5                           | 2.4                                              | 7.4                          | 7.1                                             | 1/7,900              | 1/50,100  |
| JFH1   | 3a       | S52/JFH1 <sub>I793S,K1404Q</sub>                         | 7        | 90                | 4.6                           | 2.4                                              | 8.4                          | 7.4                                             | 1/6,300              | 1/100,000 |
| 3a     | 3a       | S52 <sup>5'UTR-NS2</sup> /JFH1 <sub>I793S,K1404Q</sub>   | 7        | 95                | 4.6                           | 2.6                                              | 8.4                          | 7.9                                             | 1/6,300              | 1/199,500 |
| JFH1   | 4a       | ED43/JFH1 <sub>T827A,T977S</sub>                         | 11       | 80                | 3.5                           | 2.1                                              | 7.6                          | 6.7                                             | 1/126,000            | 1/39,800  |
| 4a     | 4a       | ED43 <sup>5'UTR-NS2</sup> /JFH1 <sub>T827A,T977S</sub>   | 11       | 80                | 3.3                           | 1.7                                              | 7.3                          | 6.9                                             | 1/10,000             | 1/158,500 |
| JFH1   | 5a       | SA13/JFH1 <sub>A1022G,K1119R</sub>                       | 9        | 90                | 5.1                           | 3.5                                              | 7.7                          | 8.3                                             | 1/400                | 1/63,100  |
| 5a     | 5a       | SA13 <sup>5'UTR-NS2</sup> /JFH1 <sub>A1022G,K1119R</sub> | 9        | 90                | 4.9                           | 3.3                                              | 7.9                          | 8.3                                             | 1/1,000              | 1/100,000 |
| JFH1   | 6a       | HK6a/JFH1 <sub>F350S,N417T</sub>                         | 7        | 80                | 4.2                           | 2.7                                              | 7.6                          | 7.2                                             | 1,2500               | 1/31,600  |
| 6a     | 6a       | HK6a <sup>5'UTR-NS2</sup> /JFH1 <sub>F350S,N417T</sub>   | 7        | 80                | 4.0                           | 2.8                                              | 7.3                          | 7.1                                             | 1/2,000              | 1/20,000  |

In comparative growth kinetics studies, Huh7.5 cells were infected with JFH1-based genotypes 1–6 5' UTR-NS2 recombinants with an MOI of 0.003 FFU/cell (Fig. 1B). Peak HCV infectivity and HCV RNA titers were determined for infection supernatants [extracellular titer (EC)] as well as for cells [intracellular titer (IC)]. The specific infectivity was calculated by the ratio of HCV infectivity/HCV RNA titers (FFU/IU). The respective virus with JFH1 5' UTR (genotype 2a) was included for comparison. IU, international units; p.i., postinfection.

**Table S2. Characterization of JFH1-based HCV recombinants containing genotypes 1–6 specific 5' UTR-NS2**

| 5' UTR-NS2 | Recombinant                                              | Transfection |                   |                                               | First passage |     |                   | Mutation                                      |        |              |
|------------|----------------------------------------------------------|--------------|-------------------|-----------------------------------------------|---------------|-----|-------------------|-----------------------------------------------|--------|--------------|
|            |                                                          | Day          | Infected cells, % | Infectivity titer, log <sub>10</sub> , FFU/mL | MOI           | Day | Infected cells, % | Infectivity titer, log <sub>10</sub> , FFU/mL | 5' UTR | Core-3' UTR* |
| 1a         | H77 <sup>5'UTR-NS2</sup> /JFH1 <sub>V787A,Q1247L</sub>   | 5            | 90                | 3.5                                           | 0.01          | 10  | 90                | 4.0                                           | G1A    | None         |
| 1b         | J4 <sup>5'UTR-NS2</sup> /JFH1 <sub>F886L,Q1496L</sub>    | 8            | 90                | 2.5                                           | 0.002         | 15  | 90                | 3.0                                           | G1A    | None         |
| 2a         | J6 <sup>5'UTR-NS2</sup> /JFH1                            | 8            | 90                | 4.5                                           | 0.006         | 5   | 80                | 4.8                                           | None   | None         |
| 2b         | J8 <sup>5'UTR-NS2</sup> /JFH1                            | 7            | 90                | 3.9                                           | n.d.          | 10  | 90                | 4.2                                           | G1A    | None         |
| 3a         | S52 <sup>5'UTR-NS2</sup> /JFH1 <sub>I793S,K1404Q</sub>   | 8            | 90                | 4.5                                           | 0.003         | 7   | 90                | 4.5                                           | G1A    | None         |
| 4a         | ED43 <sup>5'UTR-NS2</sup> /JFH1 <sub>T827A,T977S</sub>   | 5            | 90                | 3.2                                           | 0.015         | 11  | 80                | 3.5                                           | None   | None         |
| 5a         | SA13 <sup>5'UTR-NS2</sup> /JFH1 <sub>A1022G,K1119R</sub> | 5            | 90                | 4.8                                           | 0.06          | 5   | 90                | 4.9                                           | None   | None         |
| 6a         | HK6a <sup>5'UTR-NS2</sup> /JFH1 <sub>F350S,N417T</sub>   | 7            | 90                | 4.0                                           | n.d.          | 8   | 90                | 4.5                                           | G1A    | None         |

The culture supernatant from peak infection of the transfection experiment was passaged to naïve Huh7.5 cells, and the supernatant at peak infection was collected and subjected to sequence analysis of the entire HCV genome, including the 5' UTR (by 5' RACE on positive-strand HCV RNA extracted from infection supernatant), ORF (by direct sequencing of second round PCR products of 12 overlapping fragments from viral genomes recovered from infection supernatant), and the 3' UTR (by 5' RACE on negative-strand HCV RNA recovered from cells). The results showed that in recovered first-passage virus, the 5'-terminal nucleotide (nt) G of the 5' UTR of genotypes 1a, 1b, 2b, 3a, and 6a was changed to A [3a (strain S52) 5' UTR from chimpanzee plasma pool had A at the 5' terminus]; the nucleotide G, inserted immediately upstream of the 5'-terminal A of the 5' UTR of 2a, 4a, and 5a (to enhance in vitro transcription) was deleted, and the 5'-terminal A was maintained. MOI, multiplicity of infection expressed as FFU per cell; n.d., MOI was not determined; one milliliter of transfection supernatant was used for infection.

\*No mutation was acquired in the ORF; no consensus change was observed in the 3' UTR; however, the length of the poly(U/UC) tract differed among the various clones. In other independent experiment(s), mutations were identified in the ORF of the 5'UTR-NS2 recombinants of genotype 2a, 2b, and 6a. In the 2a recombinant J6<sup>5'UTR-NS2</sup>/JFH1, mutations were in NS2 [C3015C/T (I892T) and T3149T/C (Y937H)] and NS3 [C3613C/T]. In the 2b recombinant J8<sup>5'UTR-NS2</sup>/JFH1, mutations were in NS2 [C3397C/T (A1019V)] and NS3 [A3690A/T (S1117C) and T5207T/A]. In the 6a recombinant HK6a<sup>5'UTR-NS2</sup>/JFH1<sub>F350S,N417T</sub>, mutations were in E2 [A1570A/G (N410D) and G2542G/T (D734Y)], NS2 [T3017T/C (F892S)], and NS5A [A6424G/a (T2028A), G6865A/g (D2175N), T7024T/C (Y2228H), and T7157T/C (I2272T)]. Two capital letters separated by a slash indicate the presence of 50/50 quasispecies; a capital letter separated by a slash from a lowercase letter indicates quasispecies with a predominant vs. a minor nucleotide. The position corresponds to the respective genome; resulting amino acid changes are shown in parentheses.
